# Supplementary material
Source: PubMed Central journal article supplement (PMC6052273)
Supplement: AEM.00953-18_zam015188635s1.pdf [file AEM.00953-18_zam015188635s1.pdf]

## Supplementary Information

### Sections:

- 1:** Alternative averaging approach for calculating multifunctionality also indicates bicultures outperform monocultures.
- 2:** Supplementary data for transcriptomic analyses determining differential expression of lipid genes.
- 3:** Supplementary PCA data illustrating genomic distinctions between populations belonging to FAME overyielding versus non-overyielding bicultures.
- 4:** Shifts in expression at the gene-level caused by the diversity treatment significantly predict shifts metrics of biomass quality for bio-oil that depend on fatty acid composition, including Cetane Number, and Higher Heating Value.
- 5:** Background experiments used for species and media selection, as well as growth curves of all treatments in the main experiment.
- 6:** Biculture growing treatment frequently altered expression of genes regulating photosynthesis and nutrient assimilation.

**Section 1: Alternative averaging approach for calculating multifunctionality also indicates bicultures outperform monocultures.**

A)

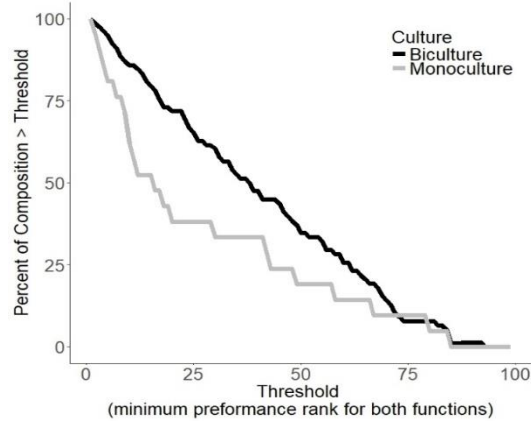

B)

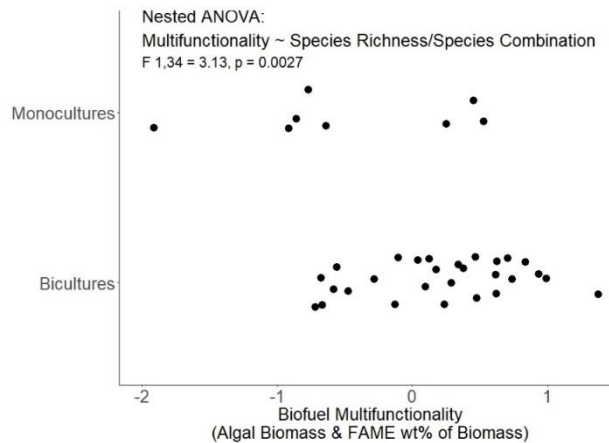

**FIG S1** There are several approaches for calculating multifunctionality. (a) Here, we show that a higher percentage of bicultures versus monocultures simultaneously exceed thresholds for biomass yield and quality. (b) Additionally, we find that bicultures outperform monocultures via the averaging multifunctionality metric. We calculated this averaging multifunctionality index where FAME (wt % of samples) and Biomass (i.e., log transformed values of population cell density multiplied by estimates of cell biovolume) values were standardized via conversion to z-scores, and the FAME and Biomass standard scores were then averaged together to yield a multifunctionality value. Averaged multifunctionality index values across biological replicates are shown. Note the nested ANOVA uses all biological replicates with species combination nested within species richness.

**Section 2: Supplementary data for transcriptomic analyses determining differential expression of lipid genes.**

**TABLE S1** Summary of species physiological and transcriptome data, including mean cell biovolumes, mean read abundance per sample for each algal species, transcript number per species before and after filtering by mapped taxon (within the Diaphoretickes), and presence/absence of functional annotation via Gene Ontology.

| Species (order)                                    | Species Biovolumes ( $\mu\text{m}^3$ ) | Mean Library Size | Total Transcripts | Transcripts Mapped to 'Green' Taxa | GO Annotated Transcripts Mapped to 'Green' Taxa | GO Annotated Lipid Transcripts |
|----------------------------------------------------|----------------------------------------|-------------------|-------------------|------------------------------------|-------------------------------------------------|--------------------------------|
| <i>Chlorella sorokiniana</i> (Chlorellales)        | 61.46                                  | 8,951,025         | 31,452            | 9,560                              | 5,892                                           | 168                            |
| <i>Closteriopsis acicularis</i> (Chlorellales)     | 511.24                                 | 6,880,563         | 37,466            | 11,334                             | 6,766                                           | 200                            |
| <i>Cosmarium turpinii</i> (Desmidiiales)           | 46330                                  | 5,324,166         | 58,333            | 14,196                             | 10,691                                          | 381                            |
| <i>Pandorina charkowiensis</i> (Chlamydomonadales) | 897.94                                 | 2,620,093         | 41,825            | 14,610                             | 9,360                                           | 290                            |
| <i>Scenedesmus acuminatus</i> (Sphaeropleales)     | 244.99                                 | 8,729,722         | 50,367            | 12,214                             | 7,584                                           | 263                            |
| <i>Selenastrum capricornutum</i> (Sphaeropleales)  | 98.72                                  | 3,554,743         | 32,085            | 10,696                             | 6,663                                           | 223                            |
| <i>Staurastrum punctulatum</i> (Desmidiiales)      | 7110.93                                | 4,476,754         | 61,441            | 12,629                             | 9,786                                           | 383                            |
| <i>Tetraedron minimum</i> (Sphaeropleales)         | 887.98                                 | 3,283,709         | 47,246            | 10,327                             | 6,405                                           | 208                            |

**TABLE S2** Our species combination treatment had a reproducible effect on algal lipid gene expression, as described with a summary table of multi-dimension scaling plots that indicate similarity in gene expression via proximity of points. An MDS plots was constructed for each of the eight algal species on all 24 biological replicates across the monoculture and biculture conditions. Reported are pairwise euclidean distances among points (i.e. biological replicates) within the same treatment versus pairwise euclidean distances among points belonging to different treatments. For the majority of species, replicates within treatments were significantly more similar in gene expression than across treatments, as indicated via t-tests where asterisks indicate significance of  $p < 0.05$ ). This same pattern was found when repeating this process for all transcripts, except *Selenastrum* showed significantly more similar expression within treatment than across treatments.

| Species             | GO Annotated Lipid Transcripts |       |   |
|---------------------|--------------------------------|-------|---|
|                     | within                         | among |   |
| <i>Chlorella</i>    | 0.82                           | 1.2   | * |
| <i>Closteropsis</i> | 1.6                            | 1.8   |   |
| <i>Cosmarium</i>    | 1.0                            | 1.4   | * |
| <i>Pandorina</i>    | 1.4                            | 1.9   | * |
| <i>Scenedesmus</i>  | 0.66                           | 1.0   | * |
| <i>Selenastrum</i>  | 1.0                            | 1.2   |   |
| <i>Straurastrum</i> | 0.67                           | 1.5   | * |
| <i>Tetraedron</i>   | 1.2                            | 1.7   | * |

**Section 3: Supplementary PCA data illustrating genomic distinctions between populations belonging to FAME overyielding versus non-overyielding bicultures.**

**TABLE S3** Variable loadings describe axes of PCA illustrated in Fig. 3. Bolding indicates Gene Ontology groups more heavily weighting PC2 and PC3, which best separated non-overyielding versus FAME overyielding bicultures. Only Gene Ontology terms shared across all eight species were used in PCA.

| Gene Ontology Term | Function                                                                 | PC1    | PC2           | PC3           |
|--------------------|--------------------------------------------------------------------------|--------|---------------|---------------|
| GO:0000062         | fatty-acyl-CoA binding                                                   | -0.012 | -0.017        | 0.185         |
| GO:0003865         | <b>3-oxo-5-alpha-steroid 4-dehydrogenase activity</b>                    | -0.077 | <b>-0.447</b> | <b>-0.425</b> |
| GO:0004149         | <b>dihydrolipoyllysine-residue succinyltransferase activity</b>          | -0.064 | <b>0.130</b>  | -0.136        |
| GO:0004583         | dolichyl-phosphate-glucose-glycolipid alpha-glucosyltransferase activity | 0.038  | -0.083        | -0.022        |
| GO:0004806         | triglyceride lipase activity                                             | -0.044 | -0.065        | -0.130        |
| GO:0005543         | phospholipid binding                                                     | -0.009 | -0.163        | 0.084         |
| GO:0006629         | lipid metabolic process                                                  | -0.029 | -0.143        | 0.099         |
| GO:0006631         | fatty acid metabolic process                                             | -0.001 | -0.107        | -0.005        |
| GO:0006633         | fatty acid biosynthetic process                                          | -0.079 | -0.111        | 0.054         |
| GO:0006635         | fatty acid beta-oxidation                                                | -0.010 | -0.022        | -0.081        |
| GO:0006644         | phospholipid metabolic process                                           | -0.040 | -0.413        | 0.255         |
| GO:0006650         | <b>glycerophospholipid metabolic process</b>                             | 0.022  | -0.219        | <b>0.349</b>  |
| GO:0006694         | steroid biosynthetic process                                             | -0.011 | -0.063        | 0.271         |
| GO:0008202         | <b>steroid metabolic process</b>                                         | -0.081 | <b>-0.453</b> | <b>-0.444</b> |
| GO:0008289         | lipid binding                                                            | -0.338 | -0.004        | 0.109         |
| GO:0008610         | <b>lipid biosynthetic process</b>                                        | -0.911 | <b>0.135</b>  | 0.035         |
| GO:0008654         | phospholipid biosynthetic process                                        | -0.013 | -0.031        | 0.175         |
| GO:0009107         | lipoate biosynthetic process                                             | 0.029  | -0.085        | 0.131         |
| GO:0009245         | <b>lipid A biosynthetic process</b>                                      | 0.011  | -0.275        | <b>0.321</b>  |
| GO:0009249         | protein lipoylation                                                      | 0.068  | 0.058         | 0.026         |
| GO:0009742         | brassinosteroid mediated signaling pathway                               | 0.003  | 0.089         | -0.134        |
| GO:0016042         | lipid catabolic process                                                  | -0.101 | -0.155        | 0.116         |
| GO:0016125         | sterol metabolic process                                                 | -0.032 | -0.167        | 0.011         |
| GO:0016992         | lipoate synthase activity                                                | 0.056  | 0.013         | 0.062         |
| GO:0019915         | lipid storage                                                            | 0.014  | -0.162        | -0.070        |
| GO:0043550         | regulation of lipid kinase activity                                      | 0.027  | -0.134        | 0.212         |
| GO:0044255         | cellular lipid metabolic process                                         | -0.035 | -0.147        | -0.092        |
| GO:0051861         | glycolipid binding                                                       | -0.060 | -0.204        | 0.084         |

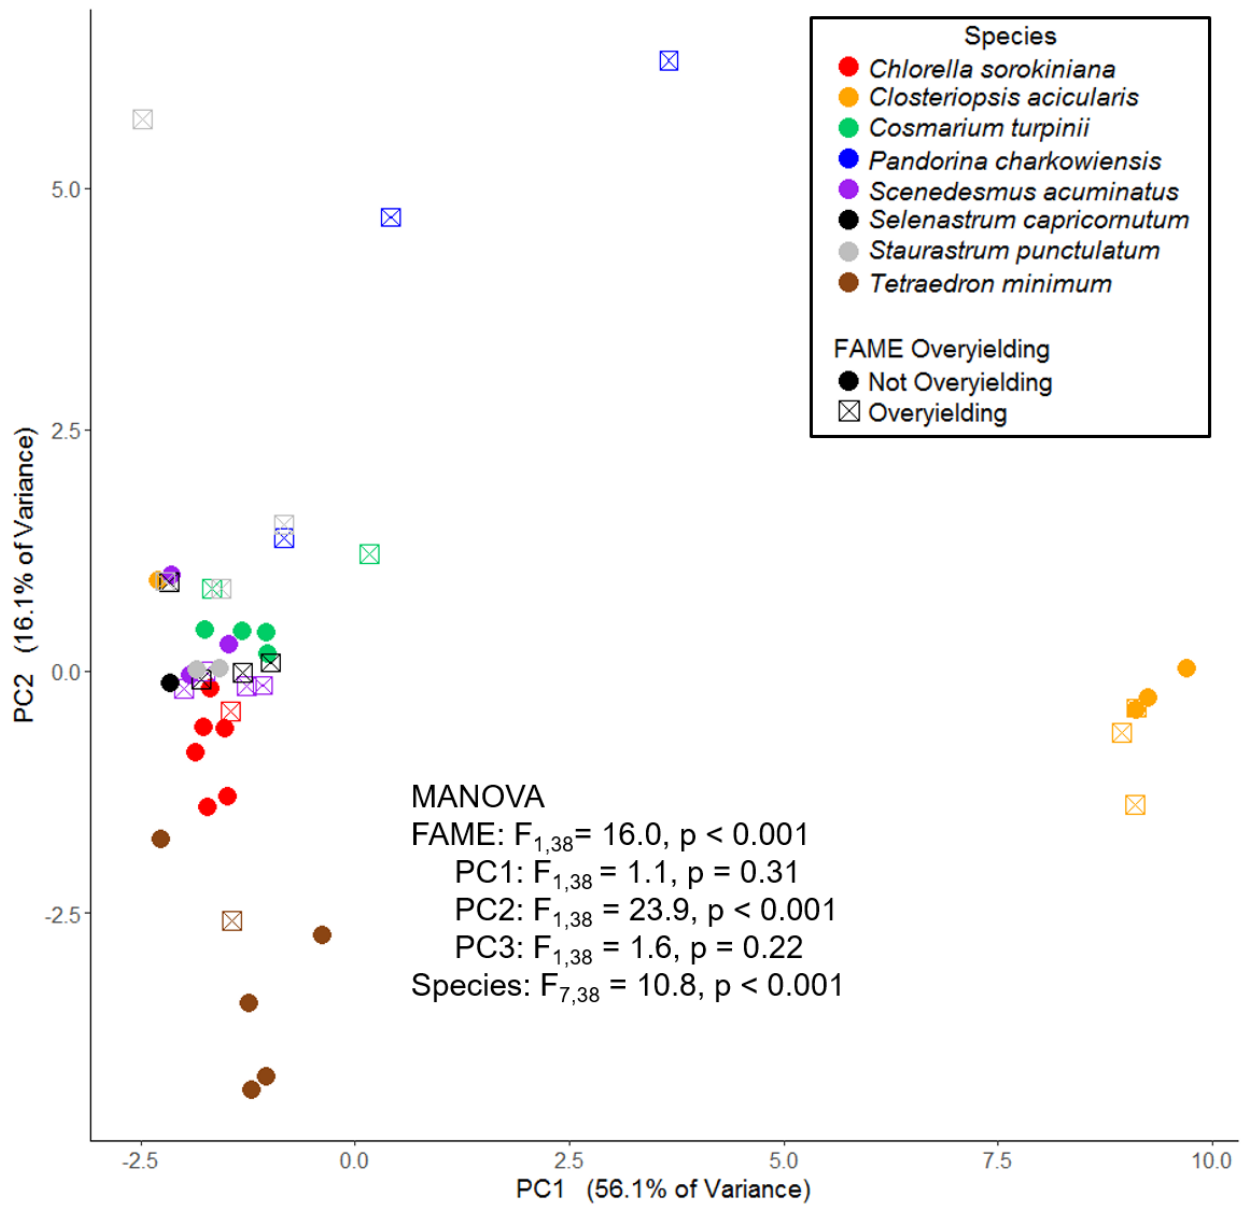

**FIG S2** In addition to Fig. 3, here we show PC1 versus PC2 of our principal component analysis that incorporates mean  $\log_2FC$  values for each algal species of 28 different Gene Ontology groups involved in lipid regulatory functions. Note PC1 is largely differences across species, while PC2 and PC3 shown in Fig. 3 more clearly illustrate that bicultures overyielding versus non-overyielding in FAME production exhibit distinct patterns of gene expression.

**Section 4: Shifts in expression at the gene-level caused by the diversity treatment significantly predict shifts in metrics of biomass quality for bio-oil, including FAME, Cetane Number, and Higher Heating Value**

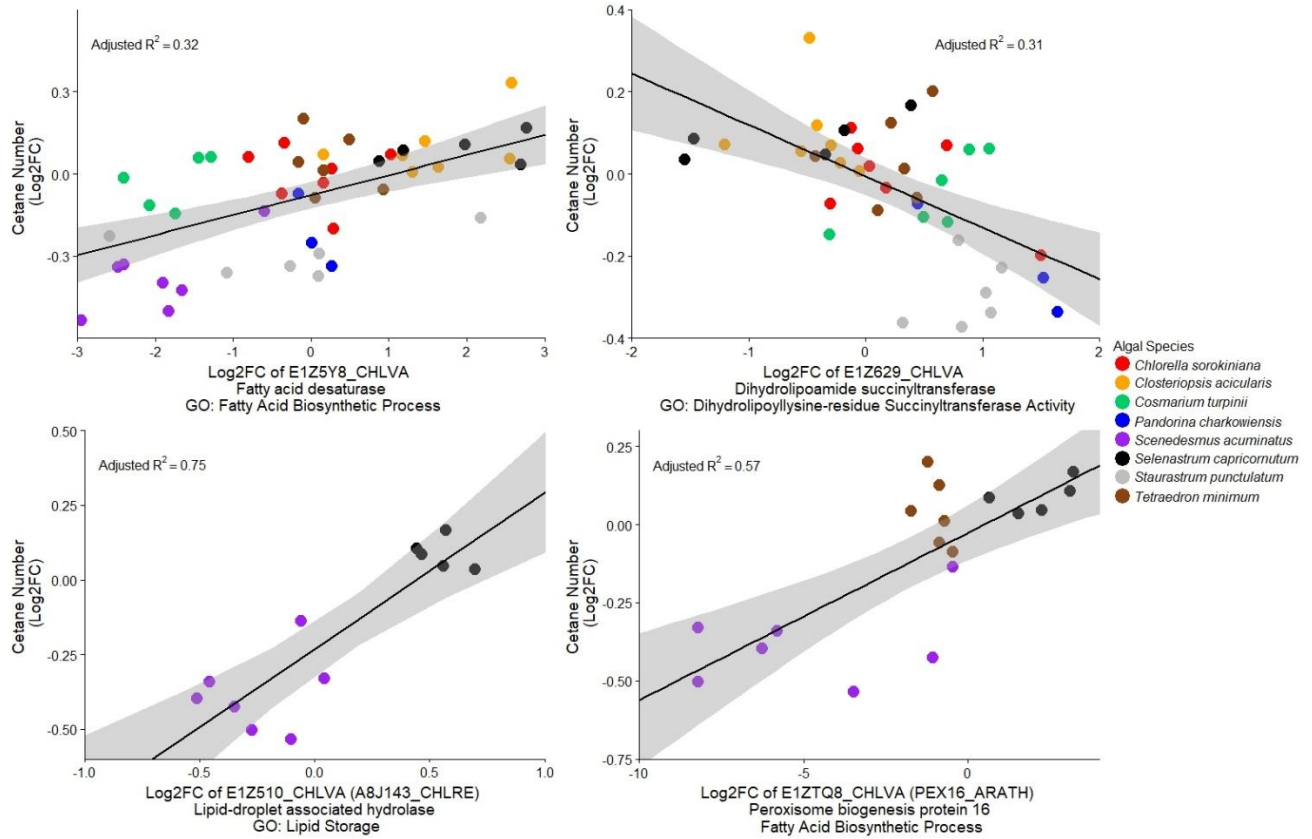

**FIG S3** Across multiple species of algae, we found that the relative change in gene expression between monoculture and biculture growing conditions significantly predicts the relative change between the monoculture and biculture levels of Cetane Number, which was measured from the extracted fatty acid methyl esters. Correlation between log<sub>2</sub> fold change of gene expression and Cetane Number in biculture relative to monoculture were evaluated via simple linear regression models with FDR significance corrections. Orthologs in *Chlorella variabilis* are used for gene annotation when possible. Occasionally, we note orthologs from other model organisms from which we needed to infer gene annotation.

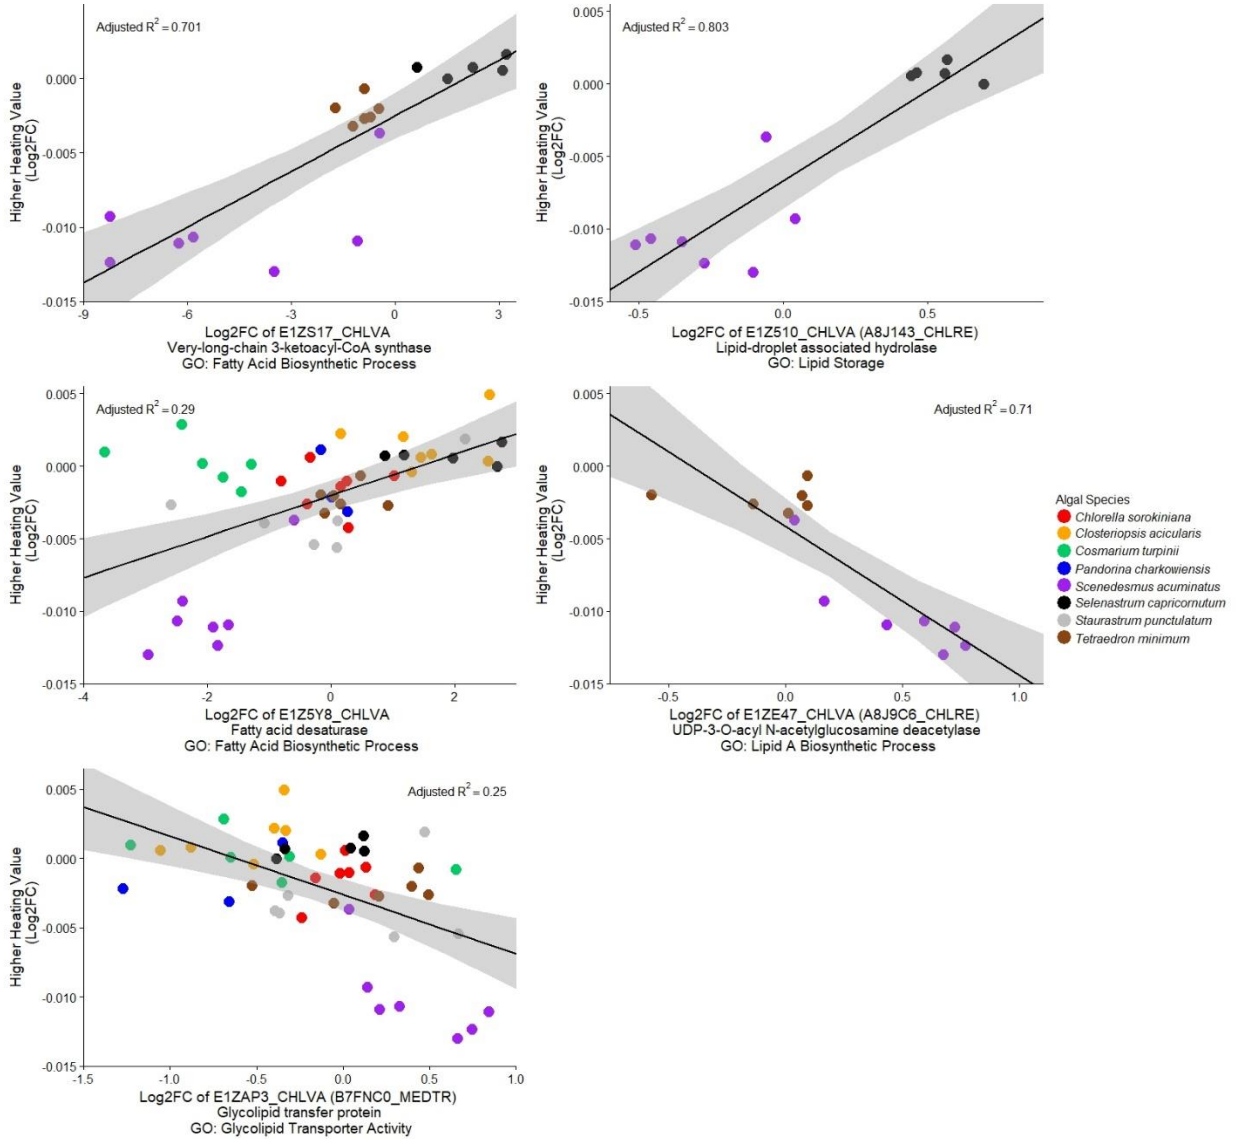

**FIG S4** Across multiple species of algae, we found that the relative change in gene expression between monoculture and biculture growing conditions significantly predicts the relative change between the monoculture and biculture levels of Higher Heating Value, which was measured from the extracted fatty acid methyl esters. Correlation between  $\log_2$  fold change of gene expression and Higher Heating Value in biculture relative to monoculture were evaluated via simple linear regression models with FDR significance corrections. Orthologs in *Chlorella variabilis* are used for gene annotation when possible. Occasionally, we note orthologs from other model organisms from which we needed to infer gene annotation.



**Section 5: Background experiments used for species and media selection, as well as growth curves for all treatments in the main experiment.**

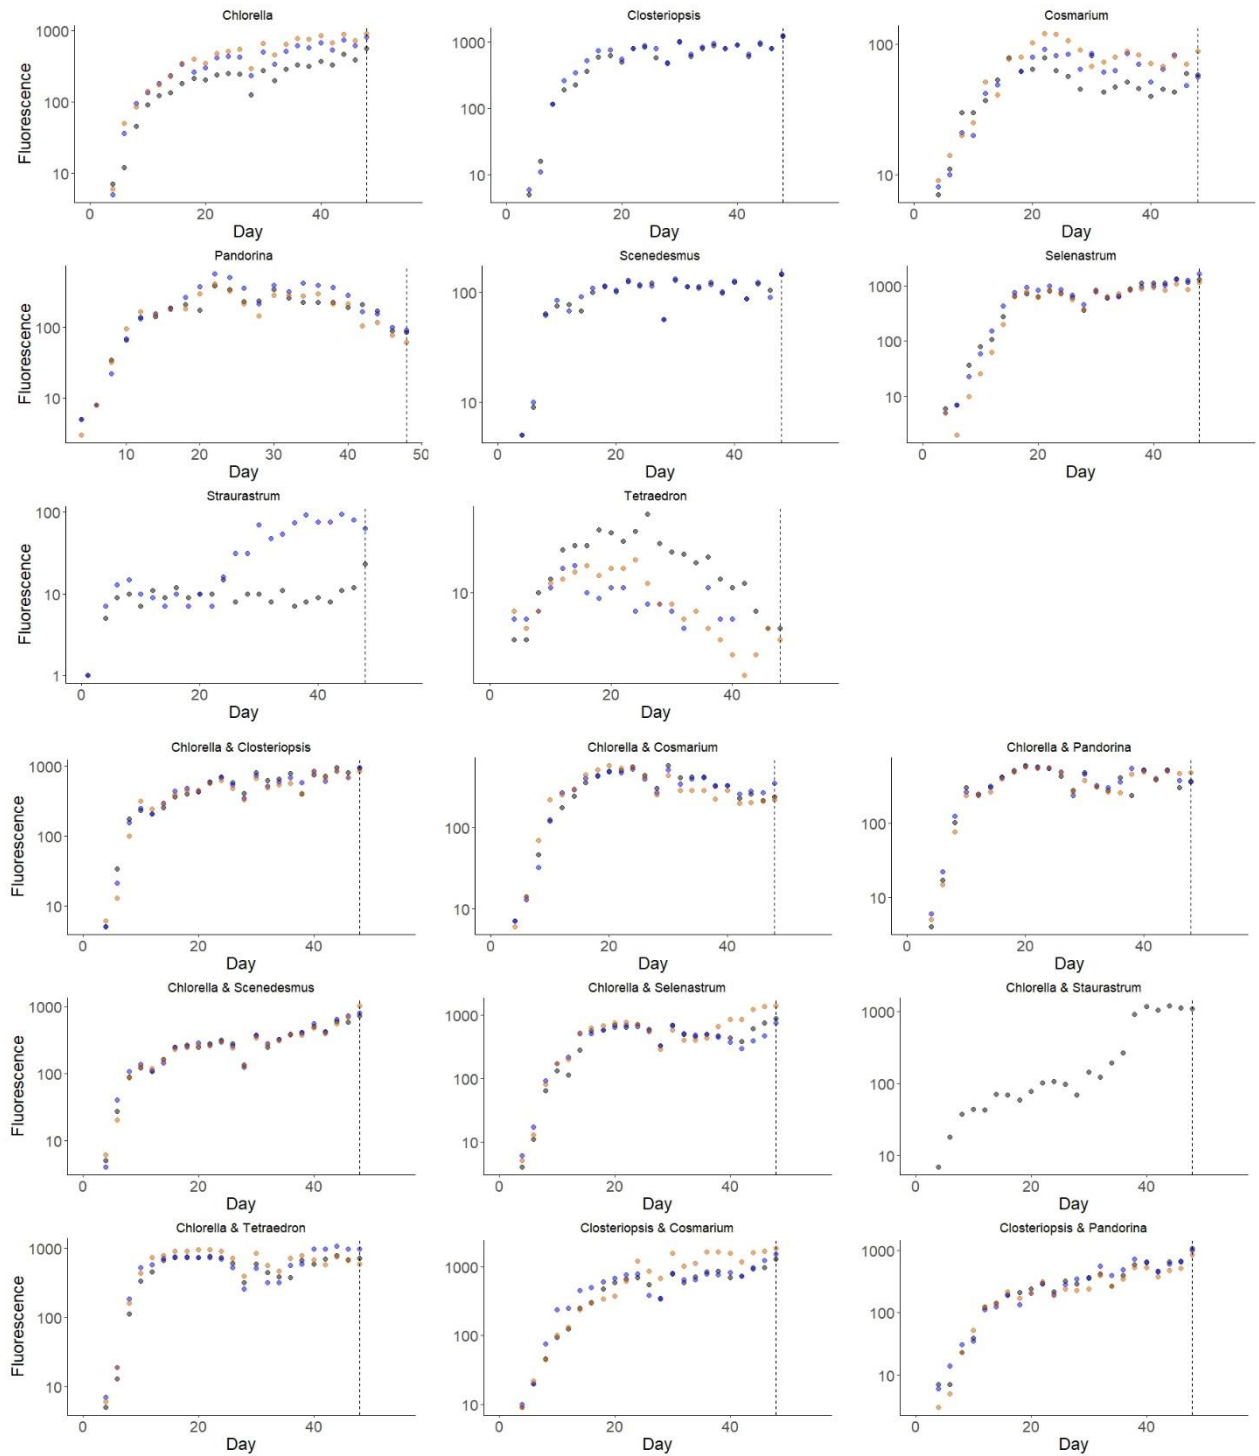

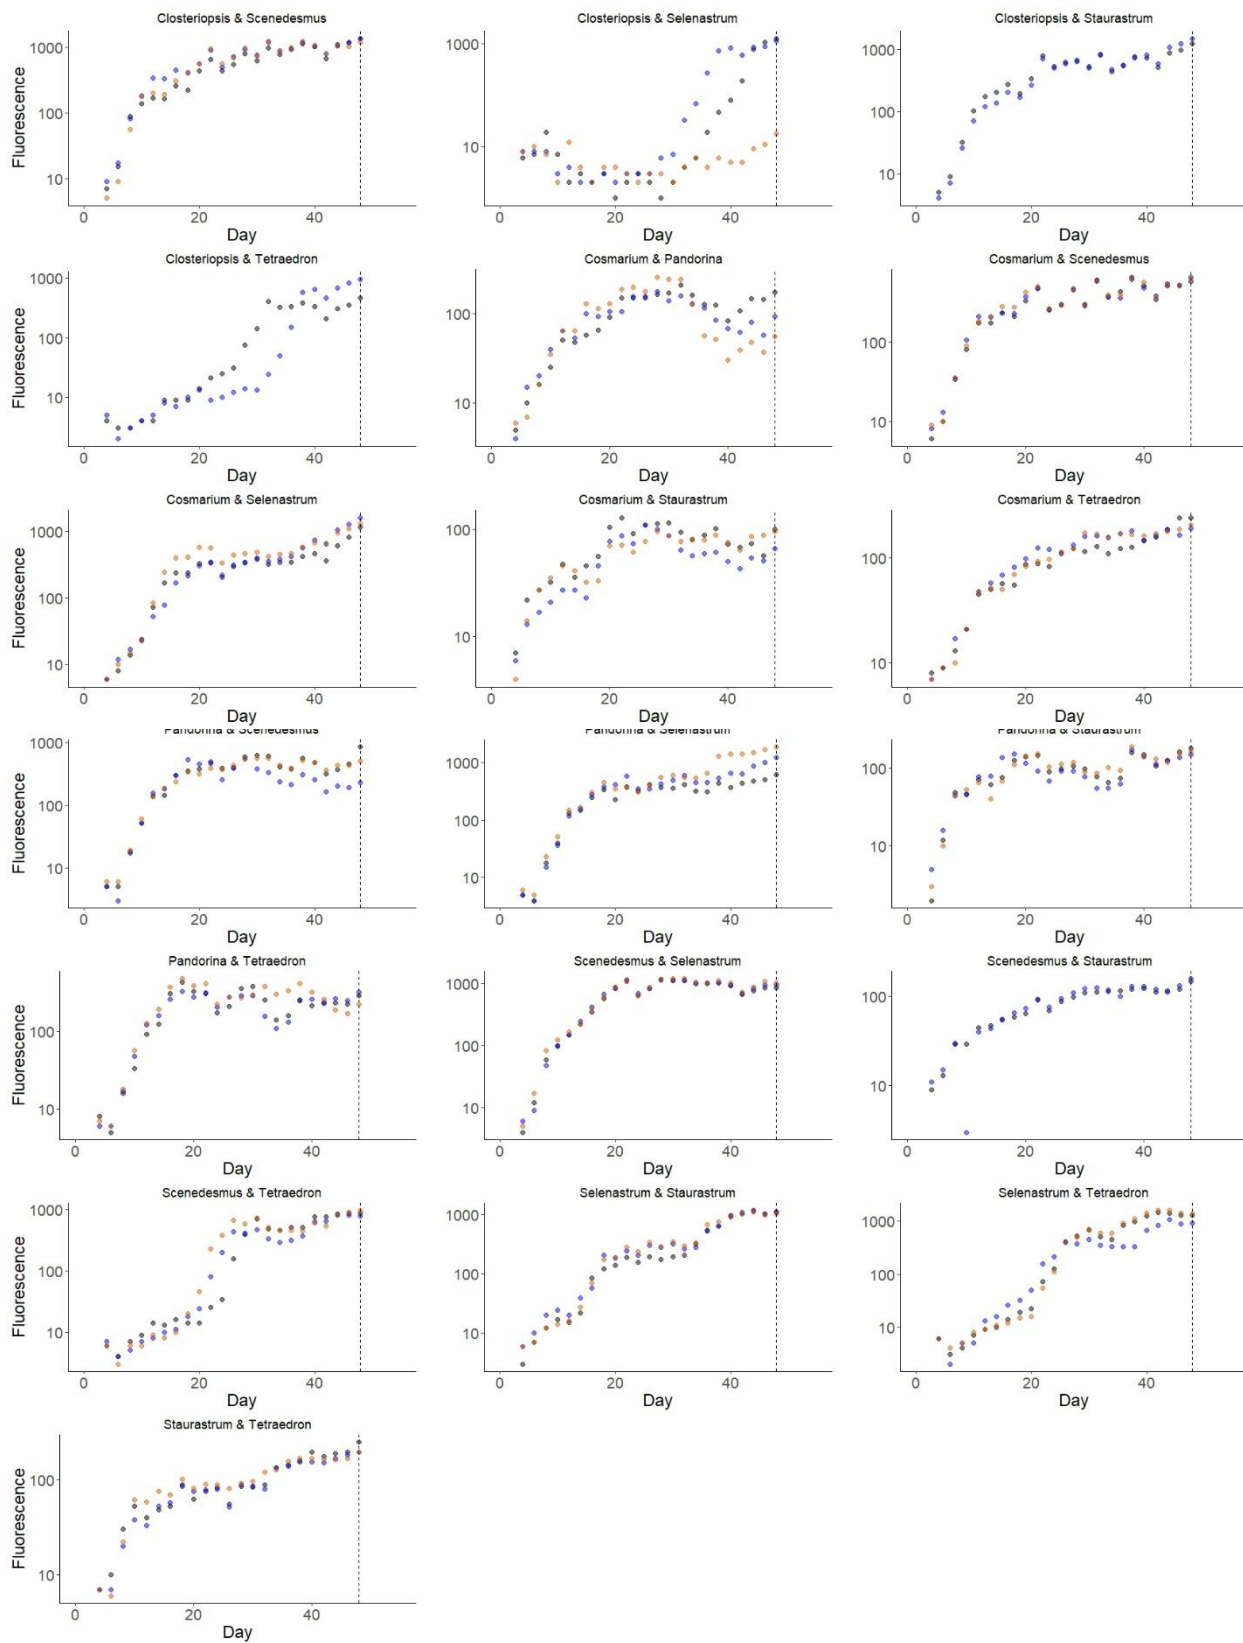

**FIG S5** Growth curves of all monocultures and bicultures using Chlorophyll-a fluorescence. Dashed vertical line at Day 48 indicates when algal biomass was collected for RNA sequencing. Color indicates replicate.

2

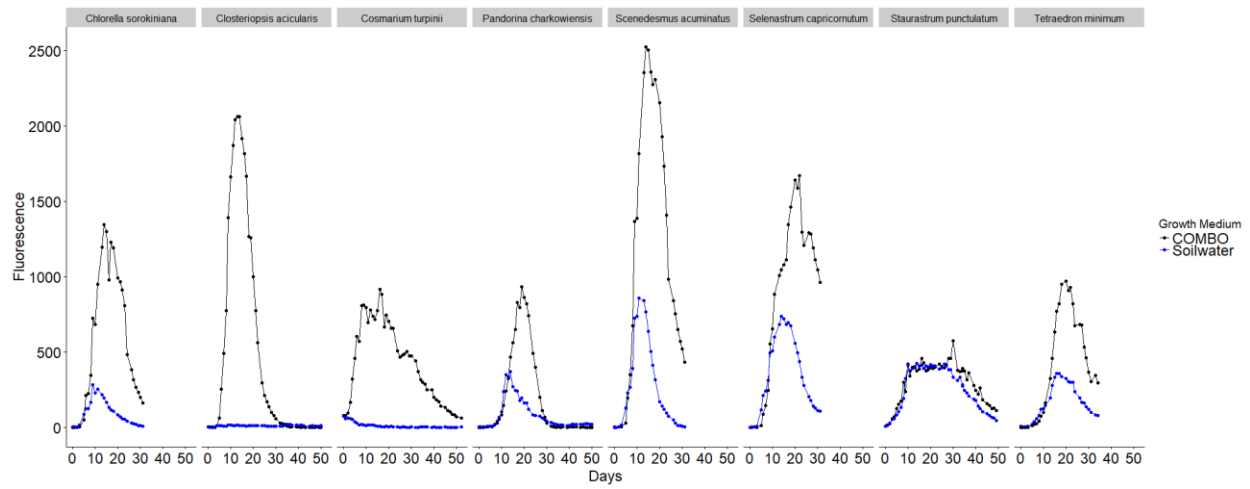

**FIG S6** Growth curves of each study species in COMBO versus Soil Water Medium illustrates positive growth of each species in COMBO. Each curve is the average of 8 replicates inoculated into medium at 1000 cells/mL in 48-well plates incubated in 16:8h light chamber.

**Section 6: Biculture growing treatment frequently altered expression of genes regulating photosynthesis and nutrient assimilation.**

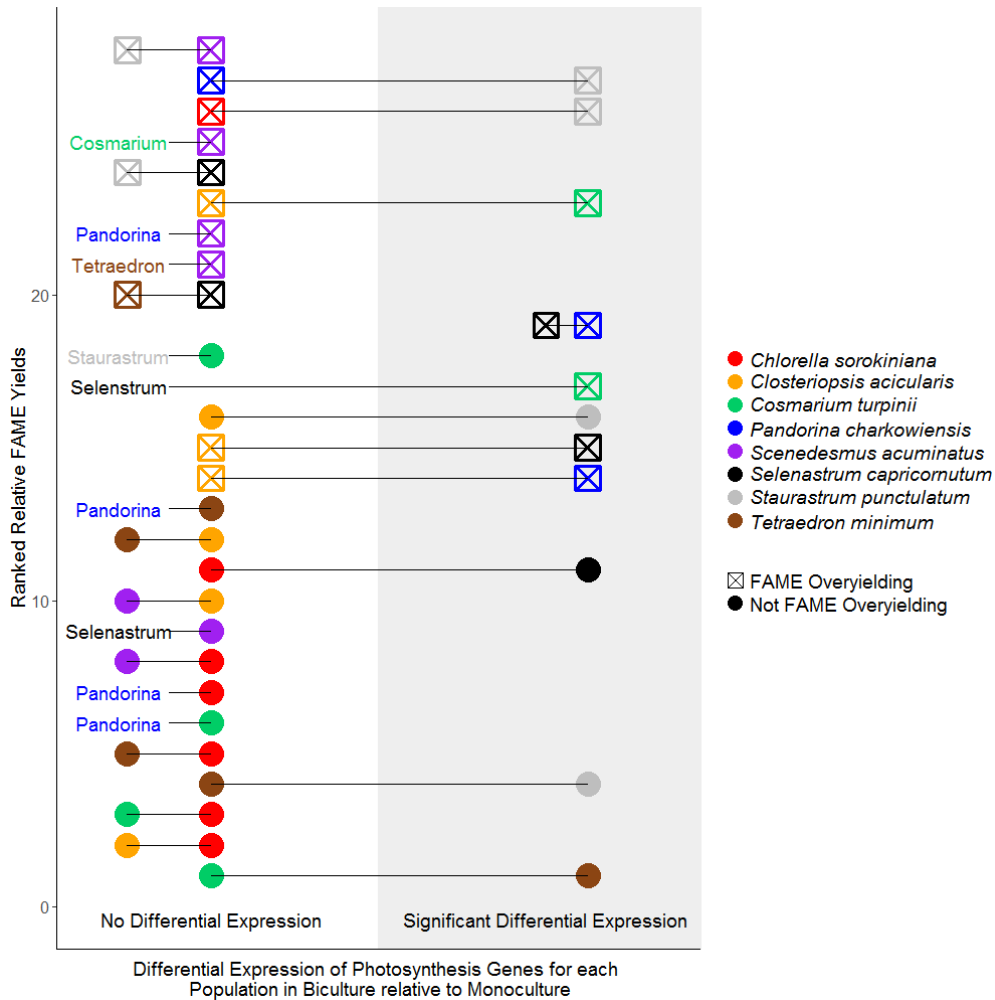

**FIG S7** While algae frequently differentially expressed genes regulating photosynthesis in biculture compared to monoculture growing conditions, there was no systematic association of this differential expression with those bicultures that significantly overyielded in FAMEs. Solid lines connect populations growing together in biculture, symbol color indicates species identities in each biculture, and symbol fill indicates whether the biculture is overyielding in biomass quantity (i.e., wt% FAMEs). Location on the x-axis indicates whether those populations significantly differentially express their photosynthesis genes via Kolmogorov-Smirnov tests on the distribution of  $\log_2$  fold change values of photosynthesis versus all other genes. Genes included in our photosynthesis group included those annotated as carbonic anhydrases, glutamate semialdehyde aminotransferases, and light harvesting chlorophyll a-b complexes.

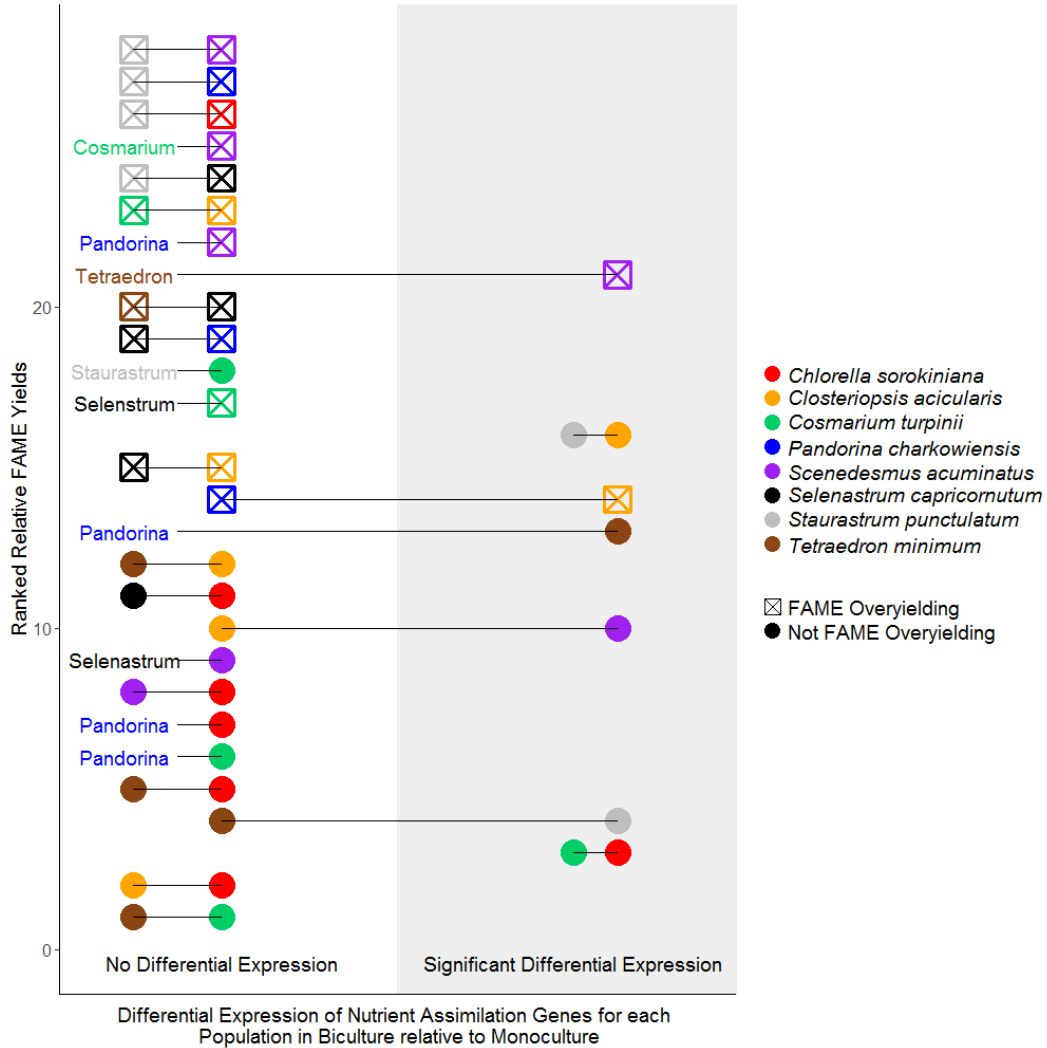

**FIG S8** While algae frequently differentially expressed genes regulating nutrient acquisition in biculture compared to monoculture growing conditions, there was no systematic association of this differential expression with those bicultures that significantly overyielded in FAMEs. Solid lines connect populations growing together in biculture, symbol color indicates species identities in each biculture, and symbol fill indicates whether the biculture is overyielding in biomass quantity (i.e., wt% FAMEs). Location on the x-axis indicates whether those populations significantly differentially express their photosynthesis genes via Kolmogorov-Smirnov tests on the distribution of  $\log_2$  fold change values of photosynthesis versus all other genes. Genes included in our nutrient assimilation group included those annotated as iron permeases, nitrite transporters, nitrite reducers, nitrate transporters, nitrate reducers, and phosphate transporters.

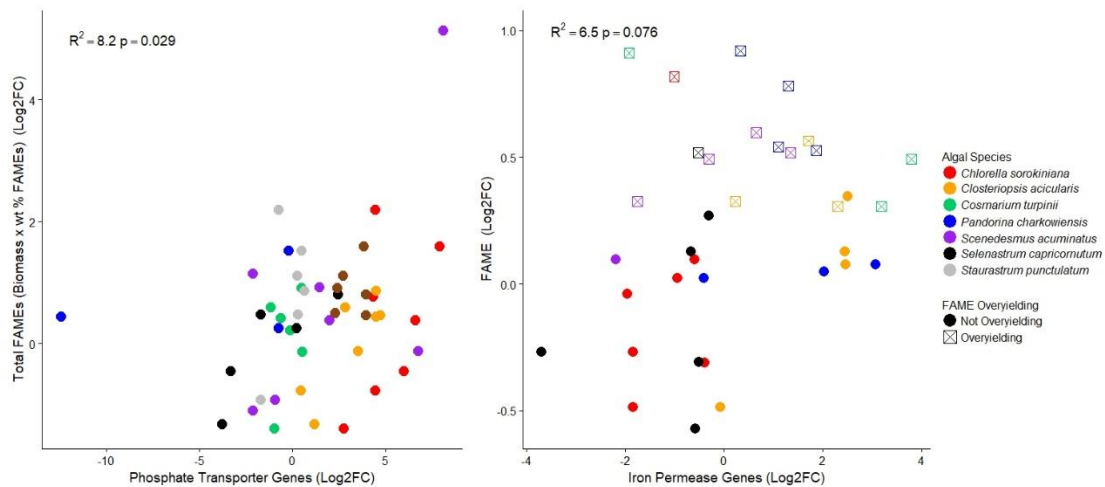

**FIG S9** The magnitude of differential expression of genes regulating nutrients assimilation and photosynthesis in biculture relative to monoculture did not significantly predict the magnitude of either FAME overyielding or total production of FAMES (i.e., biomass multiplied by the weight percentage of FAMES). Genes tested include: carbonic anhydrases, glutamate semialdehyde aminotransferases, light-harvesting chlorophyll a/b complexes, iron permeases, nitrite transporters, nitrite reducers, nitrate transporters, nitrate reducers, and phosphate transporters. When multiple transcripts within a species were annotated for a single function, i.e. phosphate transport, we use only the transcript with the greatest absolute value log<sub>2</sub>FC for each treatment. Note we illustrate results from two gene groups with the strongest results, but neither trend remains significant after false discovery rate correction.
